die mittlere monatliche sowie jahreszeitliche Wasserversetzung abgeleitet. Der mittlere Reststrom während der ganzen Beobachtungszeit war mit 1,04 sm pro Mondtag oder Doppeltide nach N 27° W gerichtet, die Geschwindigkeit war kleiner als 40 % der bei Varne-Feuerschiff festgestellten in die Nordsee gerichteten Wasserbewegung. Die Mittelwerte für die einzelnen Jahreszeiten weichen von diesem Generalmittel erheblich ab, so herrscht im Mittel im Sommer ein Reststrom von 1,26 sm/Tag nach N 65° W, im Herbst von 1,92 sm/Tag nach N 36° E, im Winter von 1,02 sm/Tag nach N 2° W und im Frühjahr von 1,48 sm/Tag nach N 55° W. In den Einzelmonaten oder gar an den einzelnen Tagen waren die Abweichungen noch erheblich grösser. Eine Beziehung des Reststromes zu der Wetterlage festzustellen, gelang nicht. Doch sollen die Untersuchungen hierüber wieder aufgenommen werden, sobald auch die Beobachtungen von Cromer Knoll-Feuerschiff vorliegen.

Da bei den Beobachtungen die Zahl der in die einzelnen 16 Fächer des Strommessers gefallen Kugeln bestimmt wurde, sind auch Schlüsse auf die mittlere Richtung der Gezeitenströme möglich, wenn sich auch die Dauer und die Eintrittszeit der einzelnen Stromrichtungen nicht feststellen lässt. Im Mittel ist der Flutstrom nach N 10° W, der Ebbstrom nach S 10° W gerichtet. Die Einzelwerte weichen von diesem Mittel zum Teil erheblich ab. Eine Untersuchung der Beziehungen zum Winde ist noch nicht durchgeführt. Weiterhin lässt sich aus der Zahl der gefallen Kugeln auch der Betrag der gesamten während einer Tide erfolgten Wasserbewegung feststellen. Dieser Wert beträgt im Mittel der 751 Mondtage 9,12 sm für einen halben Mondtag. Der gesamte während einer Tide vom Wasser zurückgelegte Weg schliesst ausser den Gezeitenbewegungen auch den Reststrom ein. Der niedrigste Wert wurde für Januar 1928 mit 6,77, der höchste für September 1928 mit 11,40 sm/Tide gefunden. Dieser Gegensatz ist besonders auch deswegen bemerkenswert, weil die gleichzeitigen Restströme keine erheblichen Abweichungen von einander zeigten.

Endlich ist auch wenigstens für den Gesamtzeitraum die Wasserversetzung nach den einzelnen 16 Richtungen bestimmt und damit die mittlere Gezeitenellipse, allerdings ohne Eliminierung des Reststromes abgeleitet worden. Es ergibt sich ein Überwiegen des Ebbstromes über den Flutstrom im Betrage von etwa  $\frac{1}{2}$  sm/Tide entsprechend dem oben angegebenen Betrage des mittleren Reststromes.

Es ist zu erwarten, dass die auf Cromer Knoll Feuerschiff im Gang befindlichen Beobachtungen das gewonnene Bild wesentlich vervollständigen werden. Im übrigen kann man dem Verfasser nur zustimmen, wenn er die Forderung aufstellt, dass von allen noch in Betrieb befindlichen hölzernen Feuerschiffen aus derartige Reststrombeobachtungen über einen längeren Zeitraum hin durchgeführt werden. BRUNO SCHULZ.

V. WALFRID EKMAN. Über die Strommenge der Konvektionsströme im Meere. Lunds Universitets Årsskrift. N. F. Avd. 2; Bd. 25; Nr. 6; Lund 1929.

Die Ausbildung einer rationellen Theorie der Meeresströmungen ist fast ausschliesslich ein Verdienst von V. W. EKMAN. Er hat in einer grossen

Zahl von Untersuchungen in folgerichtiger Entwicklung die einzelnen Stromkonstituenten der Meeresströmungen, die auf innere und äussere Kräfte zurückzuführen sind, festgestellt und gezeigt, wie diese zusammengesetzt werden müssen, um das Bild des »Elementarstromes«, das die Verteilung der Stromrichtungen und der Geschwindigkeit in allen Punkten einer Vertikalen geben soll, zu erhalten. Die drei verschiedenen Konstituenten sind in kurzen Worten folgende: 1. der reine Triftstrom, hervorgerufen durch den mitschleppenden Einfluss der Luftströmungen (innere Reibung samt Turbulenzreibung). Er reicht bis zur sogenannten »oberen Reibungstiefe«. 2. der Staustrom entsteht ohne Windeinfluss bei einer derartigen Neigung der Meeresoberfläche und der isotheren Flächen, dass der Druckgradient in allen Tiefen proportional der Dichte wird. Er setzt sich zusammen aus dem gleichmässigen Tiefenstrom und dem Bodenstrom. 3. der Konvektionsstrom ist ein Strom, der den vorhergehenden Konstituenten hinzuzufügen ist, wenn Oberfläche und isostere Fläche die tatsächliche Lage im Meer einnehmen.

Die Bewegungsgleichungen für diese Konstituenten sind aus früheren Arbeiten EKMANS bekannt. In der praktischen Ozeanographie bestimmt man die Konvektionsströme zumeist nach dem bekannten aus dem Bjerknesschen Wirbelsatz abgeleiteten Lehrsatz von HELLAND-HANSEN. Er gestattet, aus dem Massengebiet nur die Grösse und Richtung der relativen Geschwindigkeit der Schichten gegeneinander ohne Berücksichtigung der Reibung zu ermitteln. Triftströme können, als durch Reibung hervorgerufen, natürlich dadurch nicht erfasst werden, und die berechneten Konvektionsströme können vielleicht etwas, aber nicht in starkem Masse fehlerhaft werden. In der vorliegenden neuen Arbeit gibt nun EKMANS eine Methode an, aus dem Massengebiet die Strommengen eines Konvektionsstromes anzugeben, wobei der durch Vernachlässigung der Reibung auftretende Fehler ganz wegfällt. Unter Strommenge wird bekanntlich die in horizontaler Richtung in der Zeiteinheit verschobene Wassermenge verstanden, mathematisch der horizontal gerichtete Vektor  $S$ , dessen Achsen-Komponenten

$$S_x = \int \rho u dz \text{ und } S_y = \int \rho v dz \text{ sind}^1).$$

Die Integrale sind von der Meeresoberfläche ( $z = 0$ ) bis zum Boden ( $z = d$ ) zu nehmen. Bei Strommengen innerhalb einer bestimmten Wasserschicht ändert sich das Integral-Intervall. Wendet man nun die hydrodynamischen Bewegungsgleichungen der einzelnen Konstituenten des Elementarstromes bei einem Meer an, das aus einer »Deckschicht« der Tiefe  $d_i$ , die stets grösser als die Mächtigkeit der baroklinen Oberfläche oberflächenschicht ist, und aus einer barotropen Unterschicht besteht,

<sup>1)</sup> Es bedeuten:  $\rho$  die Dichte,  $u$  und  $v$  die zu  $x$  und  $y$  parallelen Komponenten des tatsächlichen Stromes,  $z$  die dynamische Tiefe, ausgedrückt in dyn. Metern,  $p$  der Druck,  $p_i$  der Druck in der dyn. Tiefe  $d_i$ , beide ausgedrückt in Dezibar. Die Grösse  $\frac{\rho}{\rho_i}$  ist abhängig von  $z$ , aber doch meistens in so geringem Masse, dass ein Mittelwert  $\epsilon$  gesetzt werden kann;  $c = \frac{1}{2\omega \sin \varphi}$ ,  $g$  die Schwere.

so lässt sich in relativ einfacher Weise die Strommenge des auf die Deckschicht beschränkten Konvektionsstromes aus dem Massenaufbau berechnen<sup>1)</sup>.

Die Ableitung soll hier nicht gegeben werden, nur das Resultat. Die Strommengenkomponenten des Konvektionsstromes sind gegeben durch die Beziehung

$$S_x''' = -\frac{100 c}{g} \frac{\partial P}{\partial y} \quad \text{und} \quad S_y''' = \frac{100 c}{g} \frac{\partial P}{\partial x}, \quad \text{worin } P = \int_0^{d_i} (-\epsilon p_i + p) dz \text{ ist.}$$

Die Grösse  $P$  ist eine Funktion von  $x$  und  $y$  und kann benutzt werden, um die Strommenge des Konvektionsstromes graphisch in ähnlicher Weise darzustellen, wie die dynamischen Isobathen einer isobaren Fläche. Aus einem gegebenen Massfeld kann  $P$  zahlenmässig ermittelt werden und es lassen sich dann aus diesen Zahlen Niveaulinien für äquidistante Werte von  $P$  zeichnen (Strommengenkarten). Der Vektor  $S'''$  folgt dann überall der Richtung dieser Niveaulinien und zwar liegt die Richtung der Strommenge *contra solem* zu der Zuwachsrichtung für  $P$ . Die Grösse der Strommenge ist für eine gegebene geographische Breite umgekehrt proportional dem Abstände zweier benachbarter  $P$ -Linien. Werden die  $P$ -Linien für alle ganzzahligen Werte von  $P$  ausgezogen, so transportiert der Konvektionsstrom z. B. quer durch einen in  $45^\circ$  Breite zwischen zwei aufeinanderfolgenden Linien gelegten Vertikalschnitt pro Sekunde 98,900 Tonnen Wasser.

Dieser neue Lehrsatz von V. W. EKMAN ist für die dynamische Ozeanographie ausserordentlich wichtig. Er gibt vor allem die Strommenge mit Berücksichtigung der Reibung und gleichzeitig die wirkliche Richtung des Wassertransportes im Konvektionsstrom, also nicht etwa relative Werte an. Eine einzige Strommengenkarte für ein Meeresgebiet legt den Wassertransport innerhalb eines Gebietes fest, die Stromkarten müssen hingegen für alle Schichten gezeichnet werden, und nur eine grosse Zahl derselben kann die Strommengenkarte ersetzen. Zwar enthält diese weniger Einzelheiten als die Stromkarten.

In der praktischen Anwendung tritt eine Schwierigkeit insoweit auf, als eine Zweiteilung, barokline Deckschicht und homogenes Tiefenwasser, meist nicht vorhanden ist. Die Schiefstellung der Isosteren gegen die Isobaren nimmt zwar mit der Tiefe ab, aber sie verschwindet nirgends vollständig. In die für eine bestimmte Tiefe  $d_i$  berechnete  $P$ -Linien-Karte geht dann nicht der ganze Konvektionsstrom ein, aber bei möglichst grosser Wahl von  $d_i$  lässt sich die Hauptsache desselben wohl erfassen. Natürlich muss  $d_i$  kleiner als die Bodentiefe sein, um einigermaßen richtige Werte zu erhalten.

V. W. EKMAN hat als Beispiel einer solchen Berechnung einer Strommengenkarte einige Beobachtungen (18 Stationen) aus dem nördlichen Golfstromgebiet benutzt, die in der Abhandlung von HELLAND-HANSEN und NANSEN »The eastern North-Atlantic« enthalten sind. Zunächst zeigt

<sup>1)</sup> Ein Massenaufbau ist barotrop bzw. baroklin, wenn die isobaren und isosteren Flächen zusammenfallen, bzw. nicht zusammenfallen.

er, dass in den obigen Formeln anstelle der Drucke  $p_i$  und  $p$  auch die sogenannten Druckanomalien gegenüber einem homogenen Meer von  $0^\circ$  und  $35 \text{ ‰}$  genommen werden können. Als Tiefe  $d_i$  der Deckschichte wählt er 1000 dyn. m. Die konstruierte Strommengkarte entspricht im wesentlichen den sogenannten Isobaren-Karten in der Abhandlung von HELLAND-HANSEN und NANSEN; die  $P$ -Linien zeigen, wie die dynamischen Isobathen, die kräftige Ausbuchtung nach Süden, die bekanntlich als Wirkung einer morphologischen Beeinflussung des Bodenreliefs auf die Meeresströmungen angesehen wird. Insofern nur die Schichte Oberfläche bis 1000 m Tiefe berücksichtigt wird, werden hier im südlichen Teil der Karte (etwa  $47^\circ$  N. Br.) etwa 2 Millionen Tonnen, im nördlichen Teil (etwa  $66^\circ$  N. Br.) rund 1,6 Millionen Tonnen Wasser per Sekunde transportiert.

Ohne Zweifel wird bei zukünftigen dynamischen Berechnungen von ozeanographischem Beobachtungsmaterial die Ermittlung der Strommengkarte eine grosse Rolle spielen und uns so einen weiteren Einblick in die Dynamik der Konvektionsströme gewähren. A. DEFANT.

J. E. FJELSTAD. Ein Beitrag zur Theorie der winderzeugten Meeresströmungen. Gerlands Beiträge zur Geophysik. B. 23, H. 3. Leipzig, 1929.

S. F. GRACE. Internal Friction in Certain Tidal Currents. Proc. Roy. Soc., A, vol. 124. London, 1929.

In the theory of ocean currents the internal friction between the water strata moving on top of one another has proved to play an important rôle. With internal friction should then be understood not only the molecular viscosity due to the irregular free motions of the individual molecules but chiefly the enormously intenser effect of turbulence, i. e., of irregular motions of larger or smaller masses of water. As a rule it has been assumed that this latter effect can be interpreted as an "eddy viscosity" acting in a similar way to molecular viscosity; so that their combined effect may be correspondingly expressed by a "virtual coefficient of viscosity", which would everywhere be much greater than the coefficient of molecular viscosity and would vary considerably from one place to another according to conditions. For the sake of mathematical simplicity, and in the absence of any other reasonable particular assumption, most oceanographers have assumed this coefficient to be constant along any vertical line.

In later times several writers have endeavoured to do without this conventional assumption, either replacing it by the more general assumption of a variable coefficient or even rejecting altogether the idea of a virtual viscosity. According to the latter view the effect of turbulence on the mean motion may be equivalent to a tangential stress, which does not, however, necessarily act in the direction of shear or vanish in case of no shear. This view has become of more actual interest in face of the important researches of L. F. RICHARDSON, according to which the eddies of turbulence — in any case in the atmosphere — may have different dimensions up to very large ones. For it is obvious that it is not strictly possible to express the effect of turbulence in terms of viscosity, if the distances covered by individual masses of turbulently moving water (corresponding to the
